# Supplementary material for: Integrative Analysis of Transcriptomic and Proteomic Changes Related to Cytoplasmic Male Sterility in Spring Stem Mustard (Brassica juncea var. tumida Tsen et Lee)
Source: MDPI journal article supplement (doi:10.3390/ijms23116248), 2022-06-02
Supplement: s1 [file s1]

**Table S1.** Statistics of RNA-seq analysis cover two stages of pollen development: 09-05B pollen of the TE stage (B-TE), 09-05B pollen of the BI stage (B-BI), 09-05A pollen of the TE stage (A-TE) and 09-05A pollen of the TE stage (A-BI) libraries including three biological replicates and assembly for *B. juncea*.

| Sample | Total reads | Q30   | GC content | Total mapped      | Multiple mapped  | Unique mapped     |
|--------|-------------|-------|------------|-------------------|------------------|-------------------|
| B-TE_1 | 46268762    | 93.75 | 47.24      | 44166788(95.46%)  | 5024175(10.86%)  | 39142613(84.6%)   |
| B-TE_2 | 45878248    | 93.65 | 47.21      | 43730551(95.32%)  | 4890810(10.66%)  | 38839741(84.66%)  |
| B-TE_3 | 45836602    | 92.7  | 46.87      | 43568969(95.05%)  | 4907489(10.71%)  | 38661480(84.35%)  |
| B-BI_1 | 45593102    | 93.66 | 46.41      | 41912135(91.93%)  | 4959005(10.88%)  | 36953130(81.05%)  |
| B-BI_2 | 46158438    | 95.7  | 46.57      | 43216083(93.63%)  | 5138978(11.13%)  | 38077105(82.49%)  |
| B-BI_3 | 46293678    | 92.87 | 46.07      | 42748439(92.34%)  | 5038490(10.88%)  | 37709949(81.46%)  |
| A-TE_1 | 43534400    | 95.71 | 45.94      | 41584300(95.52%)  | 4434931(10.19%)  | 37149369(85.33%)  |
| A-TE_2 | 49958152    | 93.56 | 47.07      | 47277708(94.63%)  | 5305367(10.62%)  | 41972341(84.01%)  |
| A-TE_3 | 45861062    | 92.5  | 46.17      | 43301437(94.42%)  | 4707316(10.26%)  | 38594121(84.15%)  |
| A-BI_1 | 46178982    | 94.56 | 47.09      | 43953236(95.18%)  | 4924837(10.66%)  | 39028399(84.52%)  |
| A-BI_2 | 45915878    | 93.41 | 47.41      | 43653645(95.07%)  | 5036611(10.97%)  | 38617034(84.1%)   |
| A-BI_3 | 44816650    | 92.68 | 46.63      | 42491659(94.81%)  | 4738146(10.57%)  | 37753513(84.24%)  |
| Total  | 552293954   | 93.73 | 46.72      | 521604950(94.45%) | 59106155(10.70%) | 462498795(83.75%) |
